# Supplementary material for: A Retrospective, Monocentric Study Comparing Co and Secondary Infections in Critically Ill COVID-19 and Influenza Patients
Source: MDPI journal article supplement (doi:10.3390/antibiotics11060704), 2022-05-24
Supplement: s1 [file s1]

# SUPPLEMENTARY DATA

Table S1. Patients characteristics according to their co-infection status.

|                                                   | COVID-19<br>n=57   |                           | Influenza<br>n=55     |                           |
|---------------------------------------------------|--------------------|---------------------------|-----------------------|---------------------------|
|                                                   | Co-infected (n=13) | Non co-infected<br>(n=44) | Co-infected<br>(n=40) | Non co-infected<br>(n=15) |
| Sex , n (%)                                       | 8 (62)             | 33 (75)                   | 22 (55)               | 8 (53)                    |
| Age (years)                                       | 63 [53-67]         | 61 [53-71]                | 64 [52-73]            | 77 [66-82]                |
| Current smokers, n(%)                             | 2 (15)             | 4 (9)                     | 19 (48)               | 4 (27)                    |
| Chronic pulmonary disease,<br>n(%)                | 4 (30)             | 13 (30)                   | 19 (48)               | 8 (53)                    |
| Obesity (BMI $\geq$ 30 kg/m <sup>2</sup> ), n(%)  | 5 (38)             | 14 (32)                   | 9 (23)                | 5 (33)                    |
| Arterial hypertension, n(%)                       | 7 (54)             | 30 (68)                   | 22 (55)               | 12 (80)                   |
| Diabetes, n(%)                                    | 0 (0)              | 11 (25)                   | 9 (23)                | 7 (47)                    |
| Charlson Comorbidity index                        | 4 [3-5]            | 3 [1-5]                   | 4 [3-5]               | 6 [4-7]                   |
| Immunosuppressive therapy,<br>n(%)                | 4 (30)             | 2 (5)                     | 17 (43)               | 7 (47)                    |
| Solid organ transplant, n(%)                      | 1 (8)              | 2 (5)                     | 5 (13)                | 1 (7)                     |
| Baseline SOFA                                     | 8 [6-12]           | 7 [3-9]                   | 6 [3-10]              | 5 [4-9]                   |
| Baseline SAPS 3                                   | 54 [48-68]         | 56 [45-67]                | 62 [54-67]            | 61 [48-73]                |
| Baseline PaO <sub>2</sub> /FiO <sub>2</sub> ratio | 140 [103-193]      | 140 [101-191]             | 148 [110-190]         | 176 [117-228]             |

Continuous variables are reported as median [Interquartile range] and categorical variables,as numbers (percentages).

Table S2. Patients characteristics according to their secondary infection status.

|                                                   | COVID-19<br>n=57              |                                     | Influenza<br>n=55                |                                     |
|---------------------------------------------------|-------------------------------|-------------------------------------|----------------------------------|-------------------------------------|
|                                                   | Secondary<br>infection (n=37) | No secondary<br>infection<br>(n=20) | Secondary<br>infection<br>(n=16) | No secondary<br>infection<br>(n=39) |
| Sex , n (%)                                       | 29 (78)                       | 12 (60)                             | 9 (56)                           | 21 (54)                             |
| Age (years)                                       | 59 [53-65]                    | 67 [53-75]                          | 62 [53-68]                       | 70 [55-81]                          |
| Current smokers, n(%)                             | 4 (11)                        | 2 (10)                              | 7 (44)                           | 16 (41)                             |
| Chronic pulmonary disease, n(%)                   | 11 (30)                       | 6 (30)                              | 6 (38)                           | 21 (54)                             |
| Obesity (BMI $\geq$ 30 kg/m <sup>2</sup> ), n(%)  | 17 (46)                       | 3 (15)                              | 4 (25)                           | 11 (28)                             |
| Arterial hypertension, n(%)                       | 25 (68)                       | 12 (60)                             | 9 (56)                           | 25 (64)                             |
| Diabetes, n(%)                                    | 8 (22)                        | 3 (15)                              | 3 (19)                           | 13 (33)                             |
| Charlson Comorbidity index                        | 3 [1-5]                       | 5 [3-5]                             | 3 [2-5]                          | 5 [3-6]                             |
| Immunosuppressive therapy,<br>n(%)                | 5 (14)                        | 1 (5)                               | 6 (38)                           | 18 (46)                             |
| Solid organ transplant, n(%)                      | 3 (8)                         | 0 (0)                               | 1 (6)                            | 5 (13)                              |
| Baseline SOFA                                     | 8 [5-10]                      | 3 [2-6]                             | 6 [2-10]                         | 6 [4-10]                            |
| Baseline SAPS 3                                   | 55 [46-66]                    | 56 [46-68]                          | 64 [56-76]                       | 61 [50-69]                          |
| Baseline PaO <sub>2</sub> /FiO <sub>2</sub> ratio | 120 [88-168]                  | 190 [134-276]                       | 148 [134-158]                    | 157 [109-224]                       |
| Vasopressors, n(%)                                | 34 (92)                       | 0 (0)                               | 13 (81)                          | 25 (64)                             |
| ECMO, n(%)                                        | 13 (35)                       | 7 (0)                               | 7 (44)                           | 1 (3)                               |

Continuous variables are reported as median [Interquartile range] and categorical variables,as numbers (percentages).
